# Supplementary material for: Gram-scale synthesis of monodisperse sulfonated polystyrene nanospheres for rapid and efficient sequestration of heavy metal ions
Source: Royal Society of Chemistry journal article supplement (doi:10.1039/c7cc07397f), 2017-01-01
Supplement: c7cc07397f1.pdf [file c7cc07397f1.pdf]

## Electronic Supplementary Information

### Gram-scale synthesis of monodisperse sulfonated polystyrene nanospheres for rapid and efficient sequestration of heavy metal ions

*Bin Gong, Yaotian Peng, Ziyang Pan, Weiming Chen, Yi Shen\*, Kaijun Xiao\*, and Ling Zhang*

E-mails: [feyshen@scut.edu.cn](mailto:feyshen@scut.edu.cn) (Y. Shen); [fekjxiao@scut.edu.cn](mailto:fekjxiao@scut.edu.cn) (K. J. Xiao)

#### Experimental Section

**Materials:** Sodium hydroxide ( $\geq 96.0\%$ ), potassium peroxydisulfate ( $\geq 99.5\%$ ) and anhydrous ethanol ( $\geq 99.7\%$ ) were purchased from the Nanjing chemical reagent Co. Ltd., China. Sulfuric acid (98.0%), nitric acid ( $\geq 68.0\%$ ), sodium dodecyl sulfate ( $\geq 99.0\%$ ), nickel nitrate ( $\geq 98.0\%$ ), potassium chloride ( $\geq 99.5\%$ ), sodium chloride ( $\geq 99.5\%$ ), calcium chloride (96.0%), iron nitrate 9 H<sub>2</sub>O (98.5%), Co(NO<sub>3</sub>)<sub>2</sub>·6H<sub>2</sub>O ( $\geq 99.8\%$ ), sodium carbonate ( $\geq 99.8\%$ ) and lead nitrate ( $\geq 99.0\%$ ) are purchased for the Damao chemical reagent co. Ltd, Tianjin, China. Styrene (98%), Cu(NO<sub>3</sub>)<sub>2</sub>·3H<sub>2</sub>O ( $> 99.0\%$ ) and zinc chloride ( $\geq 98.0\%$ ) are purchased from the Fuchen chemical reagent Co. Ltd. Tianjin, China.  $\alpha$ -Fe<sub>2</sub>O<sub>3</sub> (30 nm  $\geq 99.5\%$ ) and  $\gamma$ -Fe<sub>2</sub>O<sub>3</sub> (20 nm  $\geq 99.5\%$ ) were provided from the Aladdin Bio-Chem Technology Co. Ltd. Shanghai, China. Macroporous acidic cation exchange resin was purchased from the Qinshi technology co. Ltd., Zhengzhou, China. Talapia-fish-scale derived collagen proteins (Mw 500~600 Da) is from Baiwei Co. Ltd. Guangdong, China. Activated carbon (Norit DLC Super 50 carbon, surface area 1534 m<sup>2</sup> g<sup>-1</sup>) was provided from the Sigma Aldrich, China. All the reagents are of analytic grade. Graphene powder (surface area 247 m<sup>2</sup> g<sup>-1</sup>) was synthesized via a chemical vapor deposition method and further purified by a sedimentation process as reported in our previous work.<sup>1</sup>

*Synthesis of sulfonated polystyrene nanospheres:* Prior to synthesis, styrene was first extracted by NaOH aqueous solution (5 wt. %) and distilled water to remove any inhibitor and

further purified by reduced-pressure rotary evaporation at 60°C. PS nanospheres were synthesized via emulsion polymerization.<sup>2</sup> Typically, sodium dodecyl sulfate (0.2 g, 0.69 mmol) and Na<sub>2</sub>CO<sub>3</sub> (0.1 g, 0.94 mmol) were dissolved into distilled water (300 mL). The resulting solution was transferred to three-neck flask. The flask was purged with nitrogen gas for 30 min. Subsequently, styrene (30 mL) was added into the solution by intense agitation and the solution was heated to 60°C. After 30 min, potassium persulfate aqueous solution (15 mL, 0.23 mmol L<sup>-1</sup>) was introduced. The polymerization reaction was conducted at 75°C for 20 h. After cooling to room temperature, the product was alternately washed with ethanol and water, and dried at 60°C for further use. To obtain sulfonated PS nanospheres, PS powder (1 g) was dispersed into concentrated H<sub>2</sub>SO<sub>4</sub> (40 mL, 98 wt. %) by ultrasonication. The sulfonation reaction was conducted at room temperature for 3 h. The product was thoroughly washed by water and ethanol, and dried at 60°C using a vacuum oven.

*Determination of degree of sulfonation by titration:* The content of sulfonic groups in the resulting sulfonated polystyrene nanospheres was determined by titration. The details of experimental procedures are listed as follows: 50 mg sulfonated polystyrene nanospheres were dispersed into 50 mL of NaOH standard solution with a concentration of 0.01 mol L<sup>-1</sup> by ultrasonication. Two droplets of phenolphthalein solution were added as an indicator. The solution was titrated by HCl solution with a concentration 0.01 mol L<sup>-1</sup>. The consumed volume of HCl solution (V<sub>HCl</sub>) was recorded. The degree of sulfonation (DS) was calculated by following equation:  $DS = (0.05 \times 0.01 - V_{HCl} \times 0.01) / 0.05$

*Characterization:* The morphology of the samples was observed by field emission scanning electron microscopy (FESEM) (JSM-7600F, JEOL) and transmission electron microscopy (JEM2010, JEOL). X-ray diffraction (XRD) patterns were obtained by a diffractometer

(PW1830, Philips) equipped with Cu-K $\alpha$  radiation of 1.54 Å. The N<sub>2</sub> adsorption–desorption isotherm was obtained using the accelerated surface area porosimetry system (ASAP 2020, Micromeritics). An energy dispersive X-ray analyzer equipped in the FESEM/TEM and an axis-ultra X-ray photoelectron spectrometer (Kratos-Axis Ultra System) with monochromatized Al-K $\alpha$  radiation were used to analyze the elemental composition of the samples. Fourier transform infrared spectroscopy (FTIR) was recorded by an analyzed (Nicolet 6700, Thermo Scientific). A thermogravimetric analyzer (DTG-60H, Shimadzu) was used to investigate the thermal stability of the samples. The thermogravimetric analyses (TGA) were operated at a temperature range of 40 to 700°C using a heating rate of 20°C/min under air flow. The concentrations of metal ions were analyzed using an atomic absorption spectrometer (Z-2000 Hitachi).

*Adsorption of heavy metal ions:* Stock solution of metal solution (1000 mg L<sup>-1</sup>) was supplied from National Institute of Metrology, Beijing, China. The stock solutions were diluted to the desired concentrations with deionized water. In a typical batch adsorption test, SPS powder was introduced into pollutant solutions and then agitated at 180 rpm using a mechanical shaker at 30°C. The variations in the concentration of metal ions as a function of time were monitored using an atomic absorption spectrometer (AAS) (Z-2000 Hitachi). The adsorption up-take per unit mass of adsorbent  $q_t$  (mg g<sup>-1</sup>) at time  $t$  (min) was calculated using equation (1)

$$q_t = \frac{(C_0 - C_t)V}{W} \quad (1)$$

where  $C_0$  (mg L<sup>-1</sup>) is the initial metal ion concentration and  $C_t$  (mg L<sup>-1</sup>) is the concentration at time  $t$  (min) in the liquid phase,  $V$  (L) is the volume of the solution and  $W$  (g) is the weight of the sorbent.

To determine the equilibrium adsorption capacity  $q_e$  (mg g<sup>-1</sup>), the sorbent was immersed in the pollution solution for at least 24 h to achieve the equilibrium state of adsorption. The adsorption isotherms were fitted by Langmuir equation (2)

$$q_e = \frac{q_{\max} b C_e}{1 + b C_e} \quad (2)$$

where  $C_e$  (mg L<sup>-1</sup>) is the equilibrium concentration,  $q_{\max}$  (mg g<sup>-1</sup>) is the maximum adsorption capacity and  $b$  is the Langmuir isotherm constant, and Freundlich equation (3)

$$q_e = k C_e^{1/n} \quad (3)$$

where  $k$  and  $n$  are the Freundlich isotherm constant.

To study the kinetics of the adsorption of metal ions, three kinetic models including the pseudo-first-order, pseudo-second-order and intraparticle diffusion models were applied to fit the experimental data. The pseudo-first-order kinetic model can be expressed by equation (4)

$$\log(q_e - q_t) = \log q_e - \frac{k_1}{2.303} t \quad (4)$$

where  $k_1$  (min<sup>-1</sup>) is the adsorption rate constants of the first order kinetic model. The pseudo-second-order kinetic model is expressed by equation (5)

$$\frac{t}{q_t} = \frac{1}{k_2 q_e^2} + \frac{1}{q_e} t \quad (5)$$

where  $k_2$  (g (mg·min)<sup>-1</sup>) is the adsorption rate constants of the second order kinetic model. The intraparticle diffusion model is expressed by equation (6)

$$q_t = k_p t^{1/2} + C \quad (6)$$

where  $k_p$  (mg (g h<sup>1/2</sup>)<sup>-1</sup>) is the intraparticle diffusion rate constant and  $C$  (mg g<sup>-1</sup>) is a constant related to the thickness of the boundary layer.

To highlight the efficiency of SPS, several sorbents including activated carbon, graphene,  $\alpha$ - $\text{Fe}_2\text{O}_3$ ,  $\gamma$ - $\text{Fe}_2\text{O}_3$  and a commercial resin were also tested under identical conditions. The details of experimental procedures are: The sorbent (50 mg) was added into of  $\text{Pb}^{2+}$  solutions (100 mL) under agitation at 180 rpm using a mechanical shaker at 30°C. At given time intervals, aliquot (3 ml) was sampled and separated by centrifuge. The supernatant was filtered through a membrane filter with a pore size of 220 nm. The concentration of  $\text{Pb}^{2+}$  was analyzed by AAS.

To study the regeneration and recyclability of SPS, we conducted cyclic adsorption-desorption tests. SPS (100.4 mg) was added into  $\text{Pb}^{2+}$  solution (40 mL, 50.23 mg  $\text{L}^{-1}$ ). After reaching to an equilibrium state, SPS was separated by centrifuge. The  $\text{Pb}^{2+}$  concentration of the supernatant was determined. The resulting  $\text{Pb}^{2+}$ -saturated SPS was regenerated by immersing into  $\text{HNO}_3$  (1 mol  $\text{L}^{-1}$ ). The regenerated SPS was employed again to remove  $\text{Pb}^{2+}$  from the pollutant solutions. This adsorption-desorption process was repeated for four times. The desorption kinetics was also investigated. The details of experimental procedures are as follows: SPS powder (100 mg) was added into  $\text{Pb}^{2+}$  solution (80 mL, 50 mg  $\text{L}^{-1}$ ). After 3 h, the mixture was separated by centrifuge with an rpm of 10000 for 30 min. The supernatant was discarded. The precipitate was distributed into  $\text{HNO}_3$  (100 mL, 1 mol  $\text{L}^{-1}$ ). The concentration of released  $\text{Pb}^{2+}$  in the solution was recorded as a function of time.

For the practical application, SPS nanospheres were employed to extract heavy metals from Talapia-fish-scale derived collagen proteins. The experimental procedures are listed as follows: SPS (300 mg) was added into collagen protein solution (40 mL) by ultrasonication. The sorption process was conducted at 30°C for 3 h. Subsequently, collagen proteins were separated by centrifuge. The supernatant was filtered through a membrane filter. The concentrations of metal ions were determined accordingly.

## References

1. Y. Shen, A. C. Lua, *Sci. Rep.* 2013, 3, 3037
2. D. Y. Liu, X. X. Peng, B. H. Wu, X. Y. Zheng, T. T. Chuong, J. L. Li, S. G. Sun, G. D. Stucky. *J. Am. Chem. Soc.*, 2015, 137, 9772.

**Table S1** Fitting the equilibrium data using the Langmuir and Freundlich models

|                  | Langmuir model                   |                         |                | Freundlich model |      |                |
|------------------|----------------------------------|-------------------------|----------------|------------------|------|----------------|
|                  | $q_{\max}$ (mg g <sup>-1</sup> ) | b (L mg <sup>-1</sup> ) | R <sup>2</sup> | 1/n              | k    | R <sup>2</sup> |
| Pb <sup>2+</sup> | 83.6                             | 0.16                    | 0.9995         | 0.207            | 29.9 | 0.7281         |
| Zn <sup>2+</sup> | 25.1                             | 1.09                    | 0.9875         | 0.249            | 12.7 | 0.9946         |
| Cu <sup>2+</sup> | 19.3                             | 3.29                    | 0.9986         | 0.233            | 11.1 | 0.6943         |

**Table R2** Comparison on adsorption capacities of sorbents based on polystyrene

| Sample                          | Metal ions       | Adsorption capacities (mg/g) | References                                                        |
|---------------------------------|------------------|------------------------------|-------------------------------------------------------------------|
| D001-Polyethyleneimine          | Cu <sup>2+</sup> | 99                           | Chen <i>et al.</i> , Environ. Sci. Tech. 2010, 44, 3508-13.       |
| Sulfonated crushed polystyrene  | Pb <sup>2+</sup> | 60                           | Bekri-Abbes <i>et al.</i> , J. Polym. Environ. 2006, 14, 249-256. |
| Sulfonated polystyrene          | Cu <sup>2+</sup> | 48.8                         | Wieslaw <i>et al.</i> , J. Appl. Poly. Sci. 2013, 128, 2611-2617. |
| Sulfonated expanded polystyrene | Cu <sup>2+</sup> | 49.5                         | Wieslaw <i>et al.</i> , J. Appl. Poly. Sci. 2013, 128, 2611-2617. |
| Sulfonated waste Styrofoam      | Pb <sup>2+</sup> | 45.5 (pH=3)                  | Mahmoud <i>et al.</i> , ACS Sustain. Chem. Eng. 2015, 4, 819-827  |
| SPS nanospheres                 | Pb <sup>2+</sup> | 83.6                         | This work                                                         |
| SPS nanospheres                 | Zn <sup>2+</sup> | 25.1                         | This work                                                         |
| SPS nanospheres                 | Cu <sup>2+</sup> | 19.3                         | This work                                                         |

**Table S3** Fitting the kinetic data using the pseudo-second-order, pseudo-first-order and Intra-particle diffusion equations

|                  | Pseudo-second-order                           |                | Pseudo-first-order         |                | Intra-particle diffusion                         |                |
|------------------|-----------------------------------------------|----------------|----------------------------|----------------|--------------------------------------------------|----------------|
|                  | $k_2$ (g mg <sup>-1</sup> min <sup>-1</sup> ) | R <sup>2</sup> | $k_1$ (min <sup>-1</sup> ) | R <sup>2</sup> | $k_p$ (mg·g <sup>-1</sup> ·min <sup>-0.5</sup> ) | R <sup>2</sup> |
| Pb <sup>2+</sup> | 4.63                                          | 1              | 0.268                      | 0.38089        | 2.13                                             | 0.21518        |
| Zn <sup>2+</sup> | 0.066                                         | 0.99934        | 0.435                      | 0.97606        | 2.96                                             | 0.60523        |
| Cu <sup>2+</sup> | 0.067                                         | 0.9999         | 0.193                      | 0.90633        | 2.68                                             | 0.65551        |

**Table S4** Fitting the kinetic data obtained from different adsorbents using the pseudo-second-order equation.

| Sample                                   | Fitting equation       | qe (mg g <sup>-1</sup> ) | $k_2$ (g mg <sup>-1</sup> min <sup>-1</sup> ) | R <sup>2</sup> |
|------------------------------------------|------------------------|--------------------------|-----------------------------------------------|----------------|
| AC                                       | Y=-0.38521+0.43824X    | 2.28                     | Na.                                           | 0.99807        |
| $\alpha$ -Fe <sub>2</sub> O <sub>3</sub> | Y=0.07177+0.08111X     | 12.3                     | 0.0916                                        | 0.99994        |
| Graphene                                 | Y=0.33026+0.3182X      | 3.14                     | 0.306                                         | 0.99983        |
| Resin                                    | Y=0.93766+0.03605X     | 14.8                     | 0.0171                                        | 0.08938        |
| $\gamma$ -Fe <sub>2</sub> O <sub>3</sub> | Y=0.10697+0.10639X     | 9.39                     | 0.105                                         | 0.99992        |
| SPS                                      | Y=0.000581245+0.05188X | 19.2                     | 4.63                                          | 1              |

**Table S5** Metal concentration (mg L<sup>-1</sup>) in the collagen protein extracted from Talapia fish scale before and after SPS treatment. (Note: \* indicates that the concentration is less than the detection limit of the instrument).

| Sample                    | K <sup>+</sup> | Na <sup>+</sup> | Cu <sup>2+</sup> | Zn <sup>2+</sup> | Pb <sup>2+</sup> | Ca <sup>2+</sup> | Fe <sup>3+</sup> | Ni <sup>2+</sup> | Co <sup>2+</sup> |
|---------------------------|----------------|-----------------|------------------|------------------|------------------|------------------|------------------|------------------|------------------|
| Pristine collagen protein | 2.43           | 4.27            | 1.4              | 1.6              | 1.15             | 1.32             | 3.57             | 0.104            | 1.11             |
| Treated collagen protein  | 0.44           | 1.39            | 0.002*           | 0.01*            | 0.001            | 0.05*            | 0.001            | 0.035            | 0.002*           |



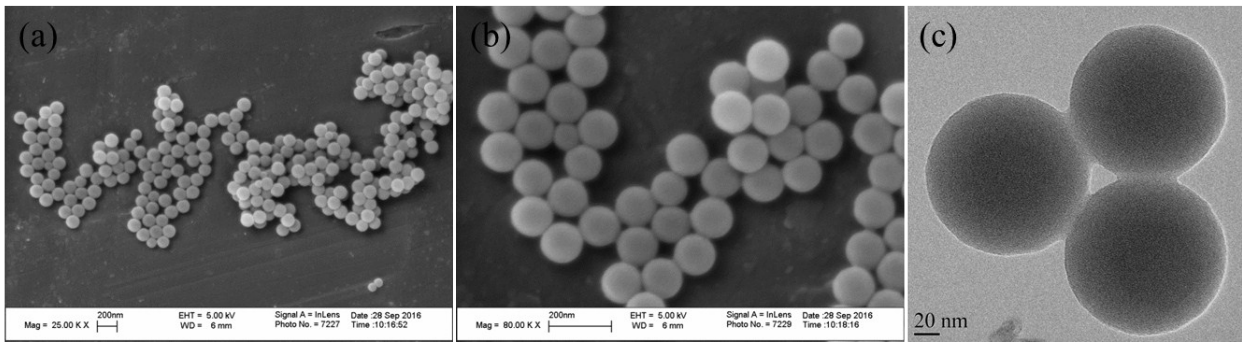

**Fig. S1** (a, b) FESEM and (c) TEM images of PS nanospheres.

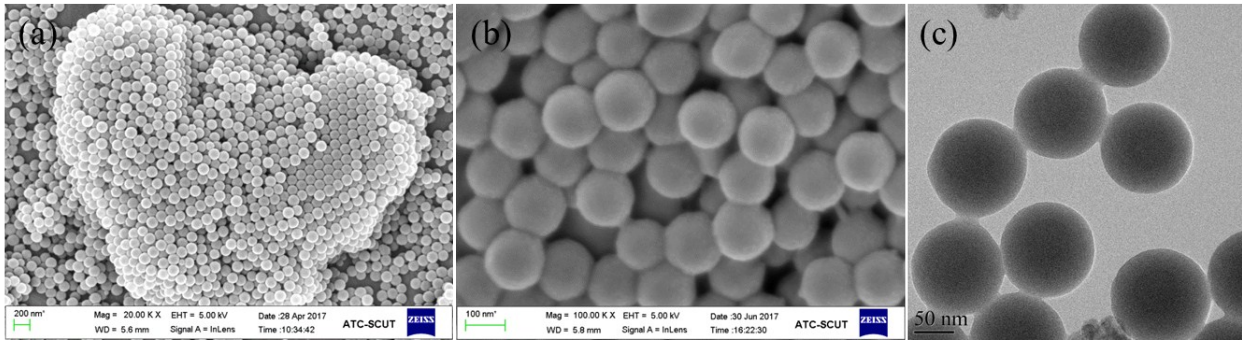

**Fig. S2** (a, b) FESEM and (c) TEM images of SPS nanospheres.

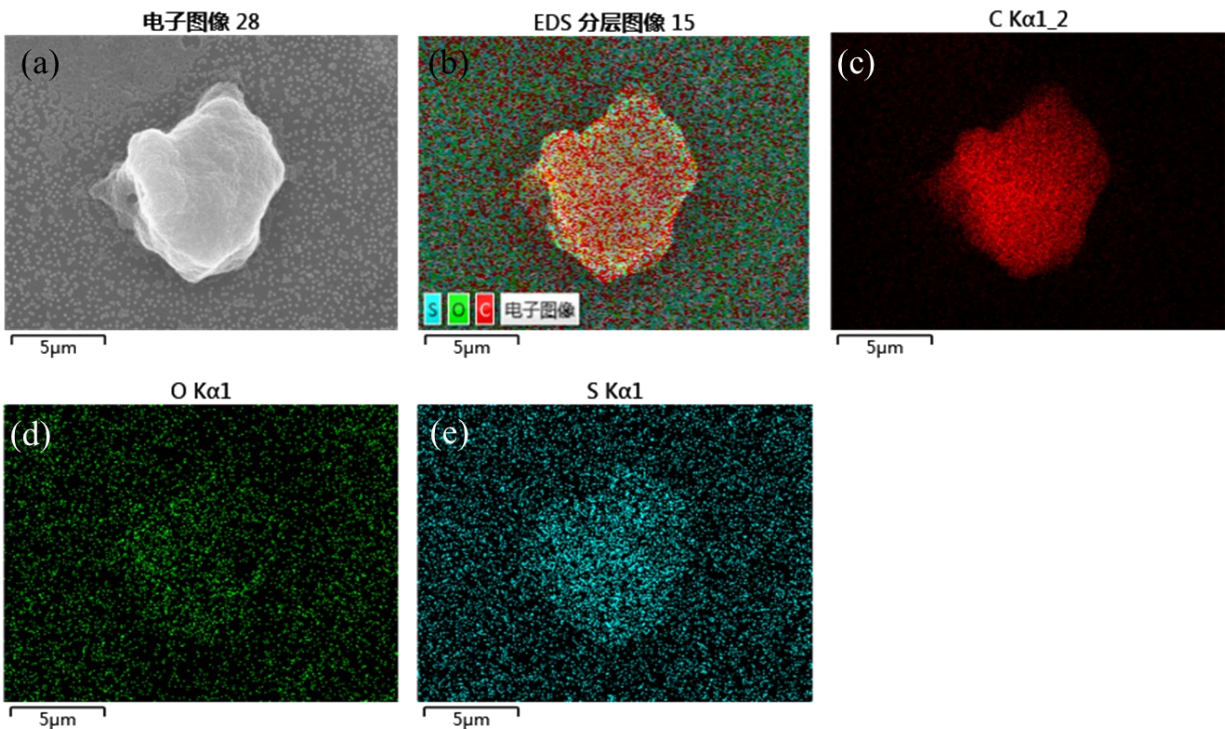

**Fig. S3** (a) FESEM and corresponding EDS elemental mapping images of (b) overall, (c) carbon, (d) oxygen and (e) sulfur element of SPS nanospheres.

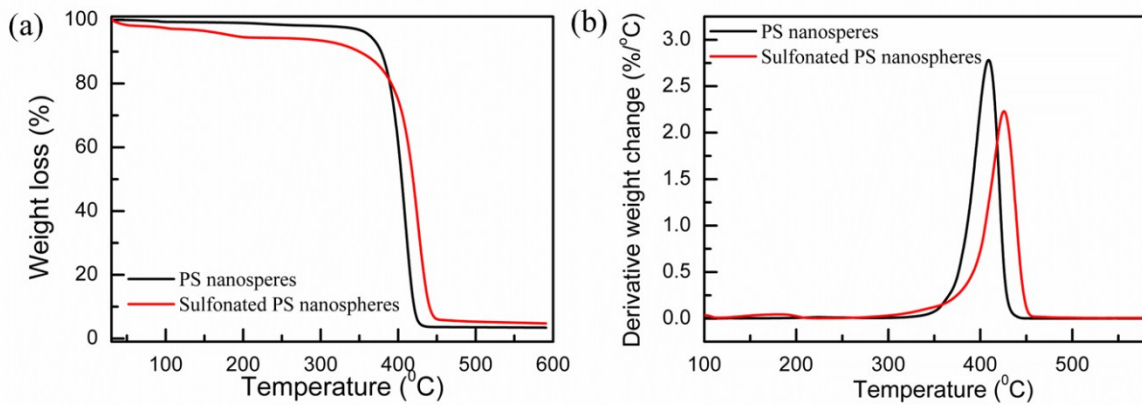

**Fig. S4** TG curves (a) and corresponding derivative curves of PS and SPS nanospheres.

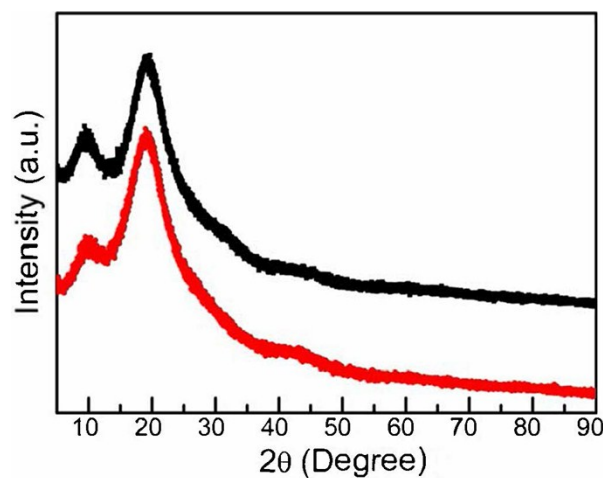

**Fig. S5** XRD patterns of PS (black line) and SPS (red line) nanospheres

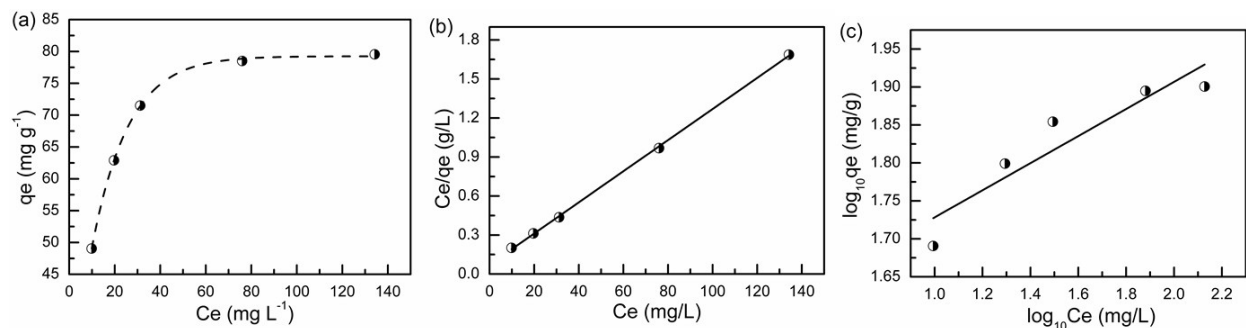

**Fig. S6** (a) adsorption isotherms of  $\text{Pb}^{2+}$  onto SPS, and fitting curves (b) by the Langmuir model and (c) Freundlich model.

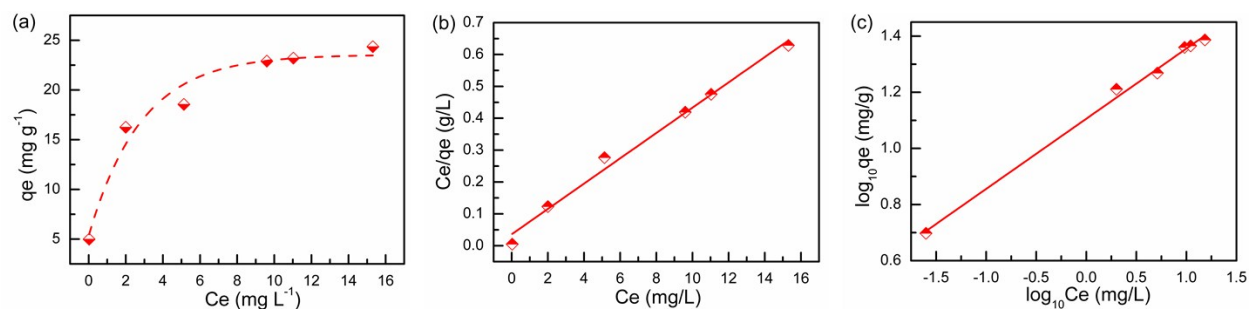

**Fig. S7** (a) adsorption isotherms of  $\text{Zn}^{2+}$  onto SPS, and fitting curves (b) by Langmuir model and (c) Freundlich model.

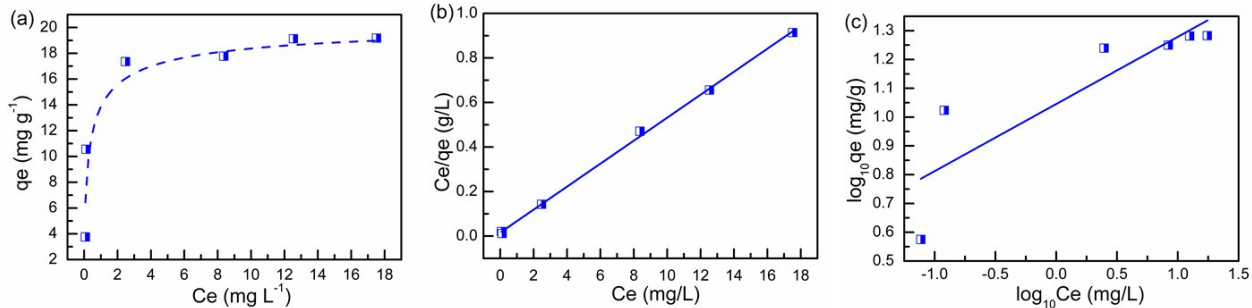

**Fig. S8** (a) adsorption isotherms of  $\text{Cu}^{2+}$  onto SPS, and fitting curves (b) by Langmuir model and (c) Freundlich model.

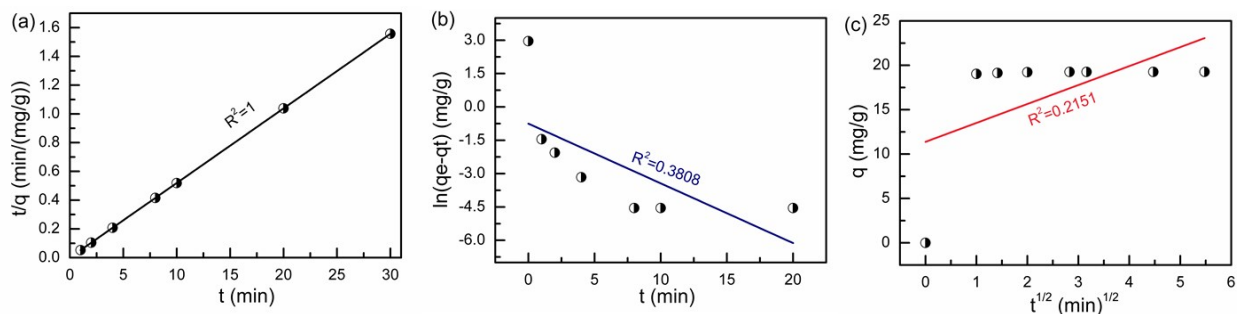

**Fig. S9** Fitting the adsorption kinetics of  $\text{Pb}^{2+}$  onto SPS using (a) pseudo-second-order, (b) pseudo-first-order, and (c) intra-particle diffusion equations.  $[\text{Pb}^{2+}]_0=10 \text{ mg L}^{-1}$

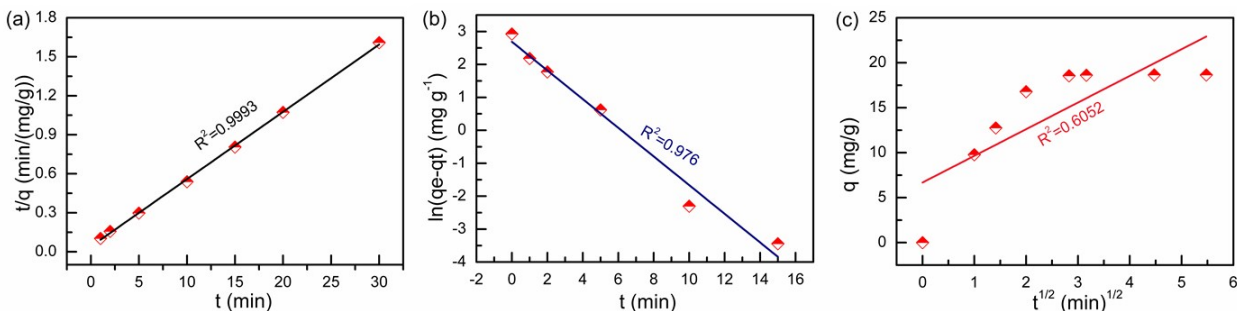

**Fig. S10** Fitting the adsorption kinetics of  $\text{Zn}^{2+}$  onto SPS using (a) pseudo-second-order, (b) pseudo-first-order, and (c) intra-particle diffusion equations.  $[\text{Zn}^{2+}]_0=10 \text{ mg L}^{-1}$

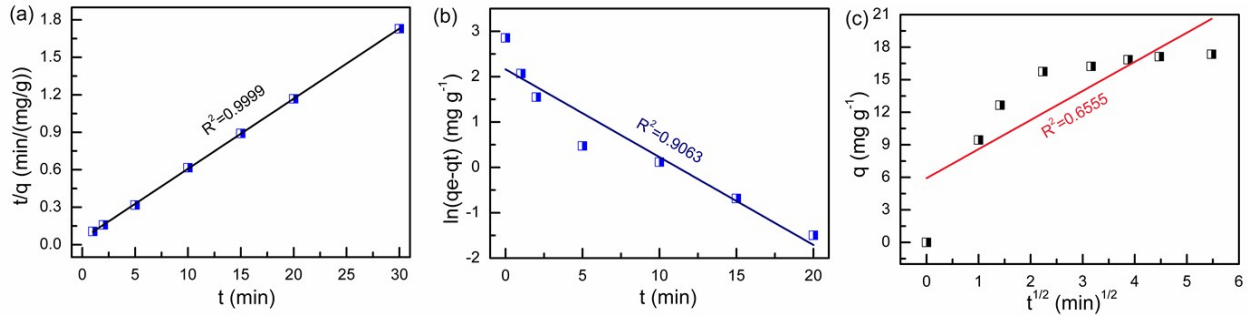

**Fig. S11** Fitting the adsorption kinetics of Cu<sup>2+</sup> onto SPS using (a) pseudo-second-order, (b) pseudo-first-order, and (c) intra-particle diffusion equations. [Cu<sup>2+</sup>]<sub>0</sub>=10 mg L<sup>-1</sup>

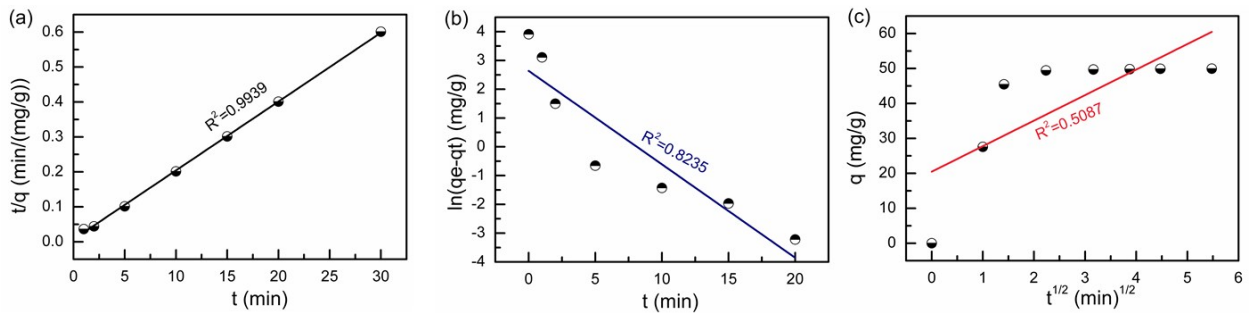

**Fig. S12** Fitting the adsorption kinetics of Pb<sup>2+</sup> onto SPS using (a) pseudo-second-order, (b) pseudo-first-order, and (c) intra-particle diffusion equations. [Pb<sup>2+</sup>]<sub>0</sub>=25 mg L<sup>-1</sup>

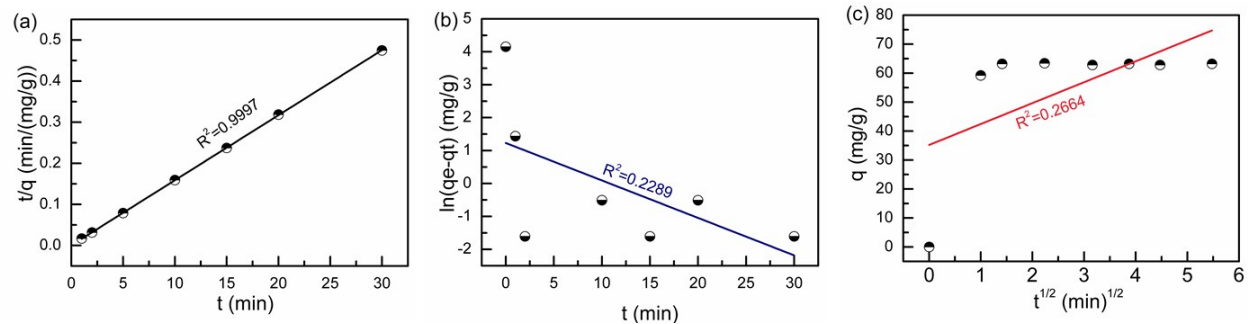

**Fig. S13** Fitting the adsorption kinetics of Pb<sup>2+</sup> onto SPS using (a) pseudo-second-order, (b) pseudo-first-order, and (c) intra-particle diffusion equations. [Pb<sup>2+</sup>]<sub>0</sub>=100 mg L<sup>-1</sup>

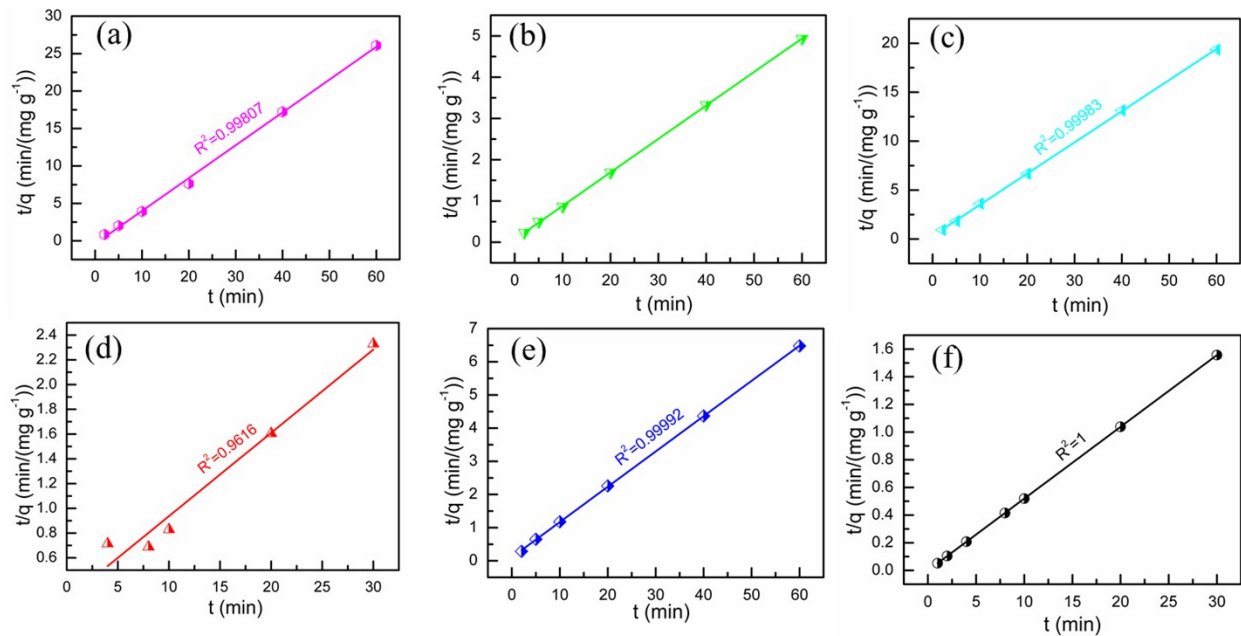

**Fig. S14** Fitting the adsorption kinetics of  $\text{Pb}^{2+}$  onto (a) AC, (b)  $\alpha\text{-Fe}_2\text{O}_3$ , (c) graphene, (d) commercial resin, (e)  $\gamma\text{-Fe}_2\text{O}_3$  and (f) SPS using the pseudo-second-order model.

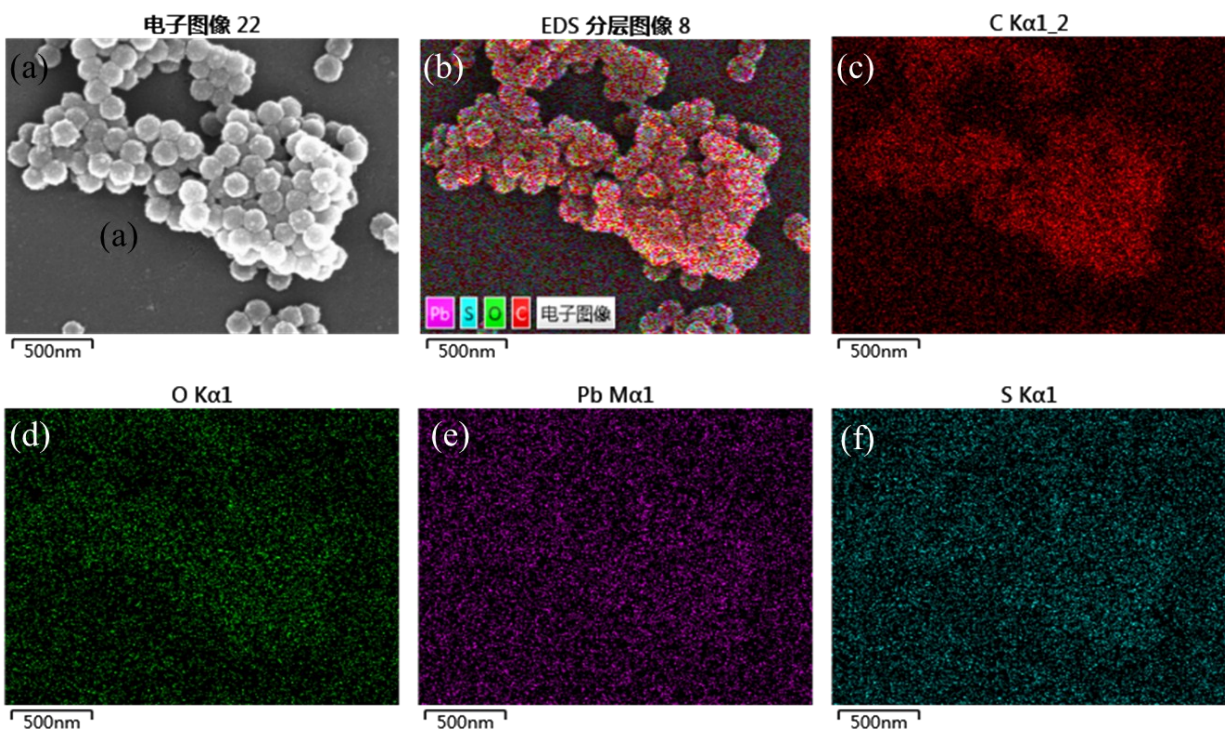

**Fig. S15** (a) FESEM image of  $\text{Pb}^{2+}$ -adsorbed SPS and corresponding EDS elemental mapping images of (b) overall, (c) carbon, (d) oxygen, (e) lead, and (f) sulfur element.

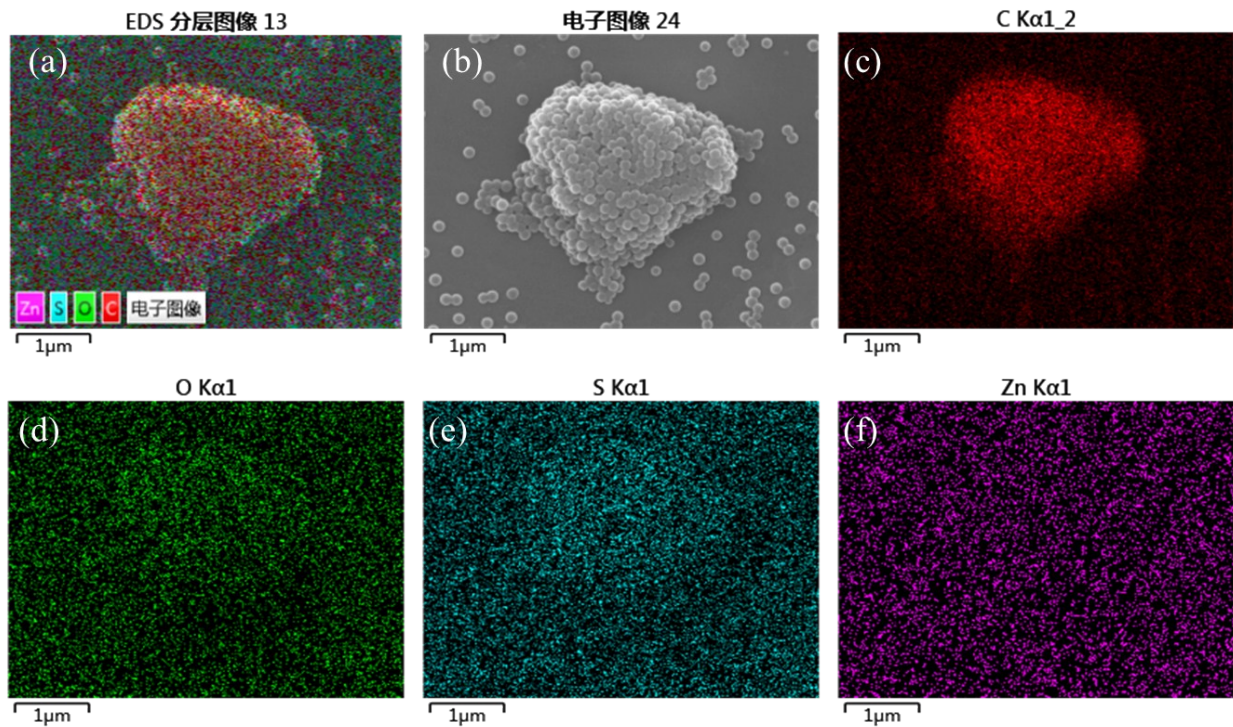

**Fig. S16** (a) FESEM image of Zn<sup>2+</sup>-adsorbed SPS and corresponding EDS elemental mapping images of (b) overall, (c) carbon, (d) oxygen, (e) sulfur, and (f) zinc element.

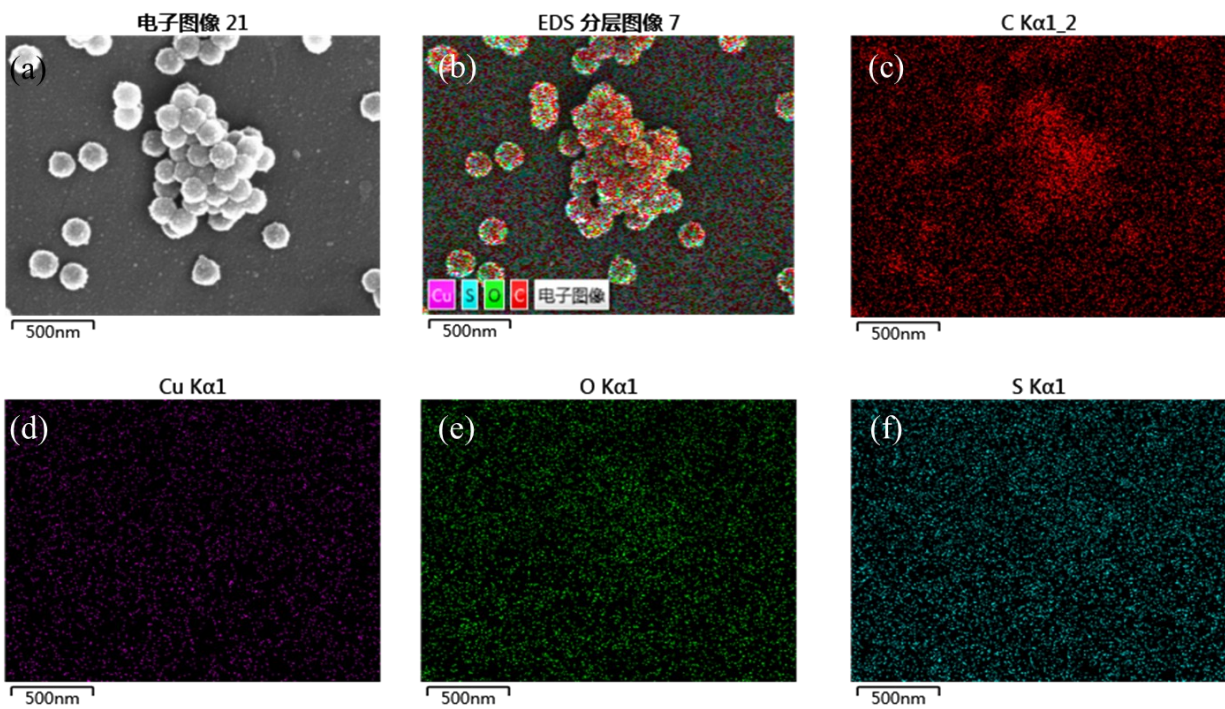

**Fig. S17** (a) FESEM image of Cu<sup>2+</sup>-adsorbed SPS and corresponding EDS elemental mapping images of (b) overall, (c) carbon, (d) copper, (e) oxygen, and (f) sulfur element.

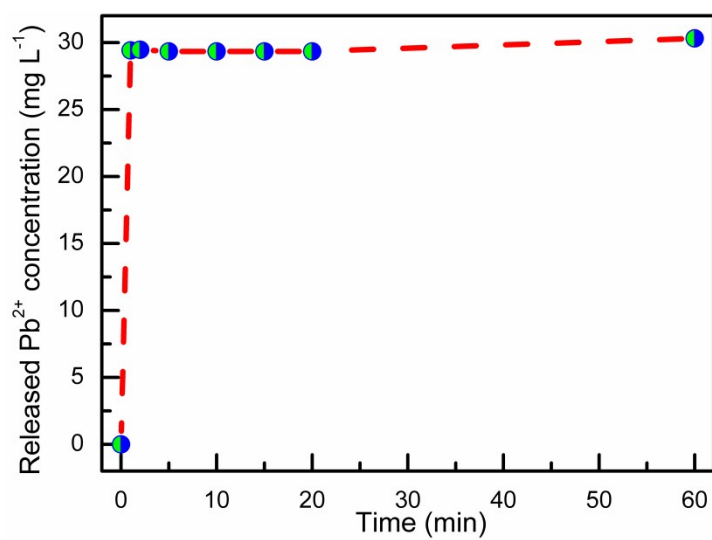

**Fig. S18** Pb<sup>2+</sup> concentrations recorded during desorption experiment as a function of time.

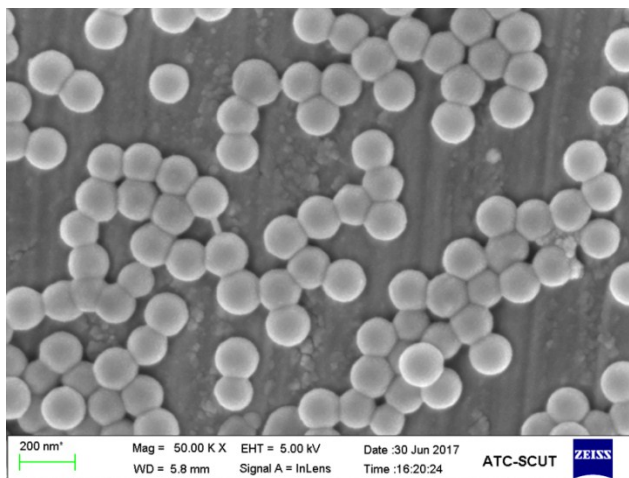

**Fig. S19** FESEM image of spent SPS nanospheres after cyclic tests.
